# Supplementary material for: Soil Microbial Communities Associated With Biodegradable Plastic Mulch Films
Source: PubMed Central journal article supplement (PMC7691482; doi:10.3389/fmicb.2020.587074), 2020-11-13
Supplement: Data_Sheet_1.pdf [file Data_Sheet_1.pdf]

## Supplementary Figures and Tables

### Supplementary Figures

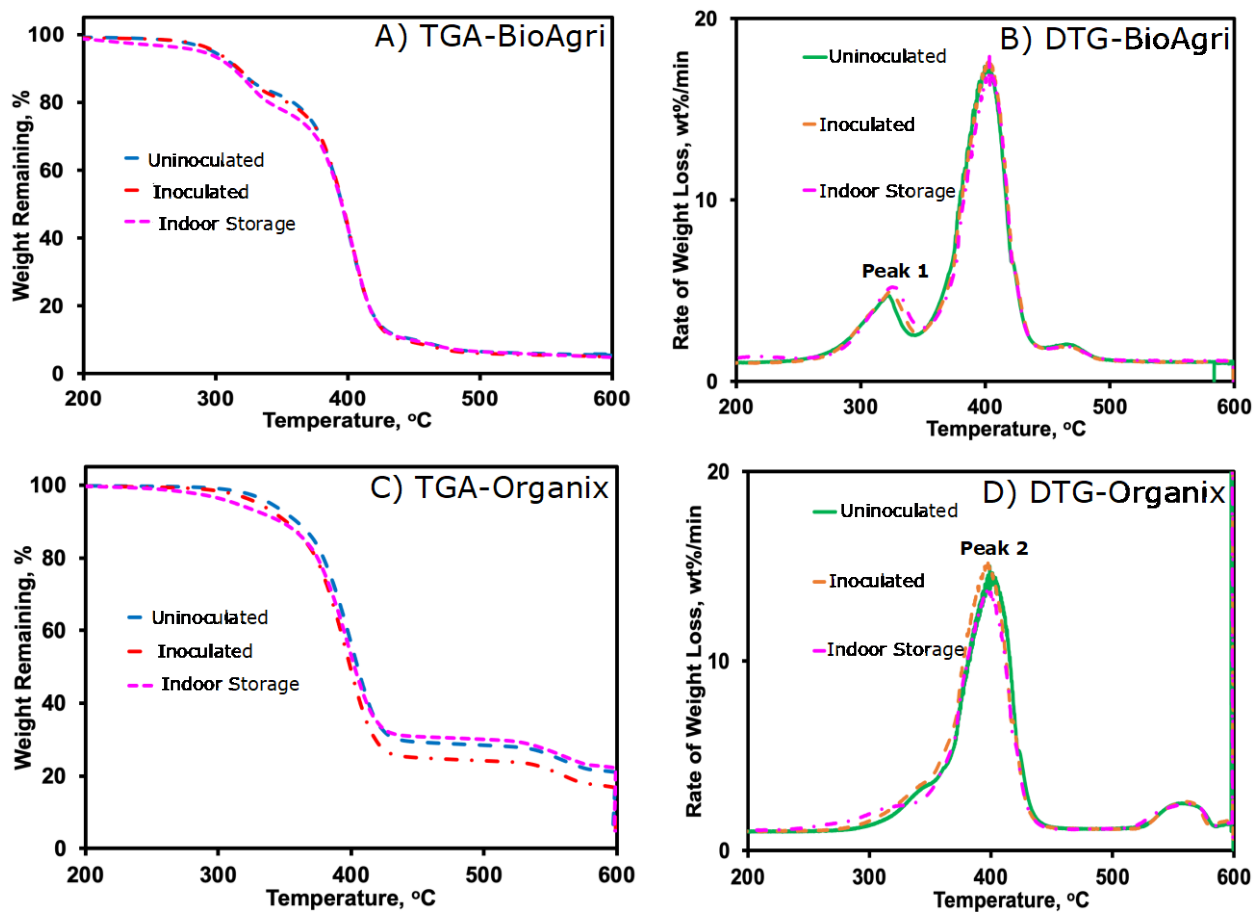

**Figure S1:** Thermograms (TGA) (A and C) and differential thermograms (DTG) (B and D) of BioAgri and Organix from lab incubation study showing percent weight remaining and rate of weight loss after heating the plastics at a constant rate (10°C/min). “Indoor Storage” refers to unweathered mulch films which were kept in a storage cabinet in the dark at room temperature. Peak 1 is attributable to starch in BioAgri, Peak 2 is attributable to PBAT in Organix and BioAgri.

### A) BioAgri

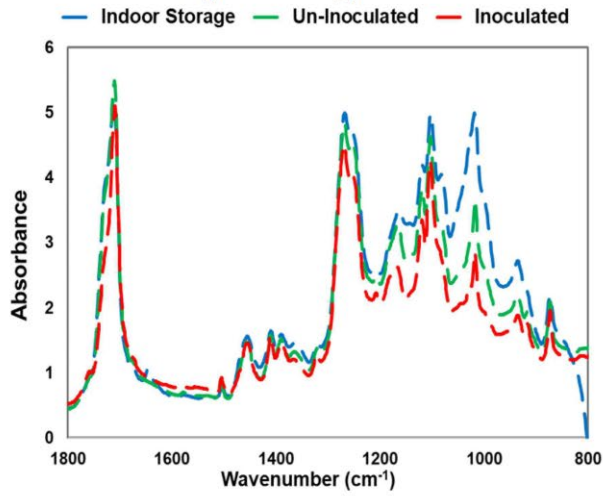

### B) Naturecycle

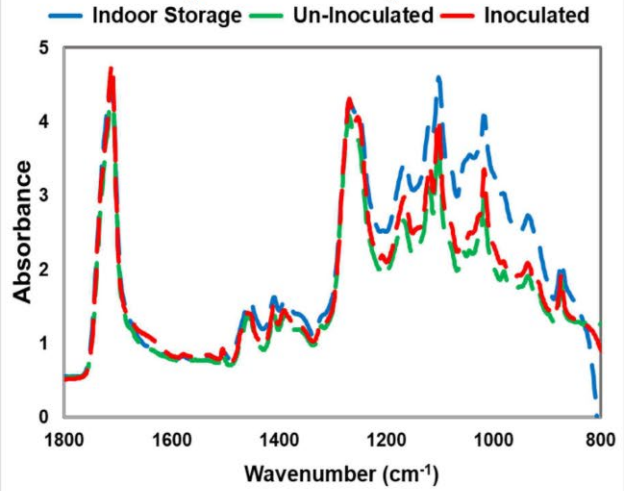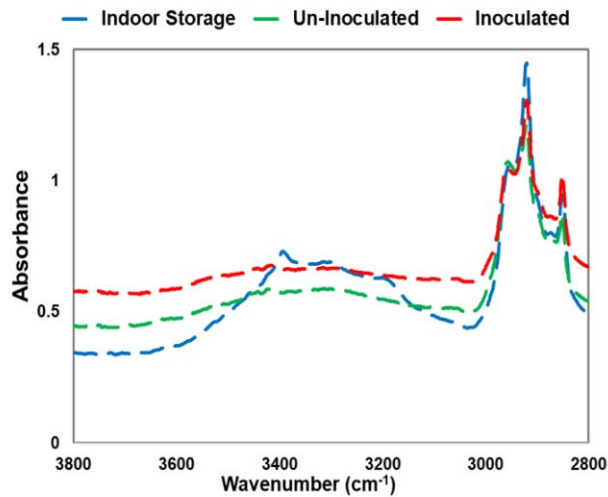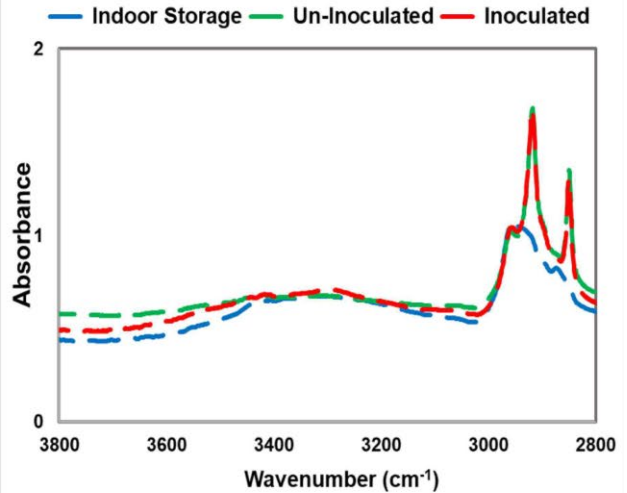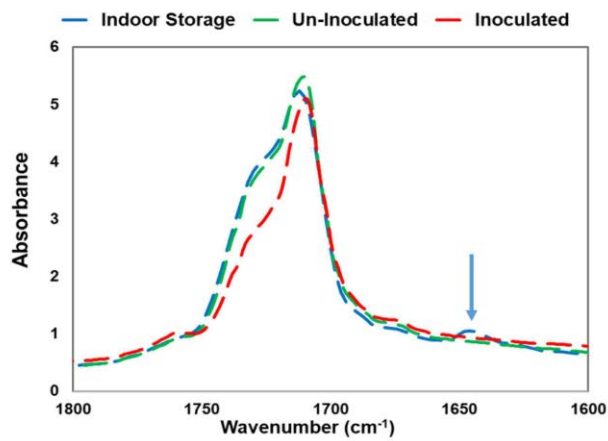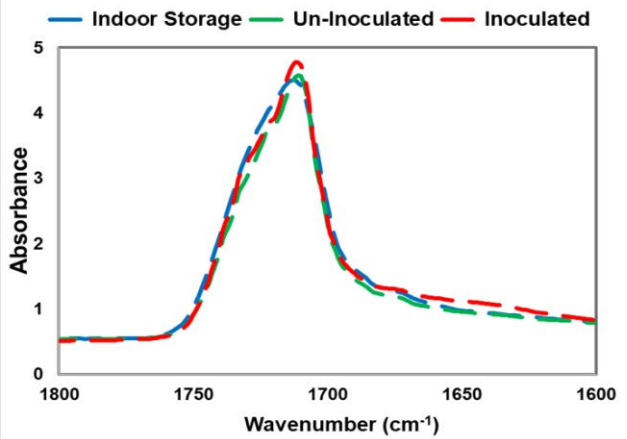

### C) Organix

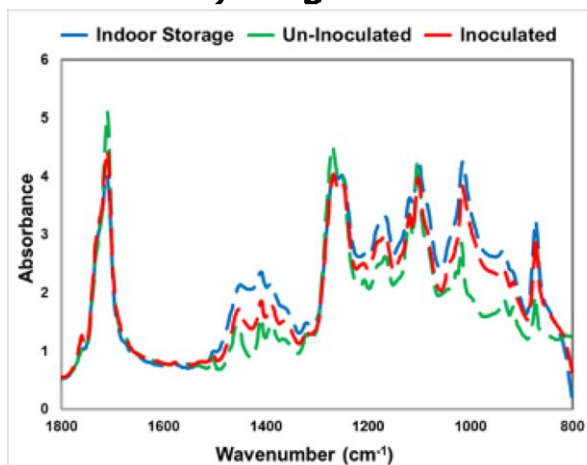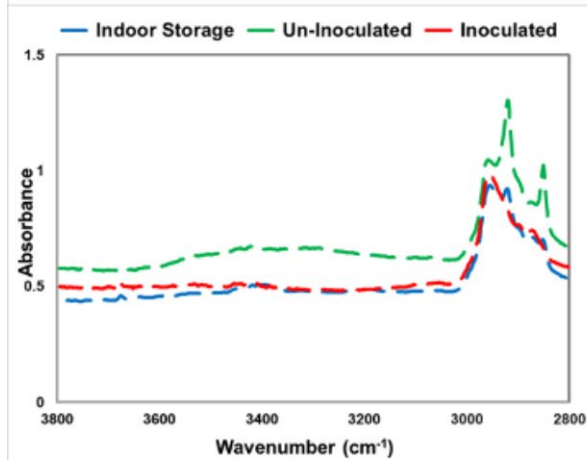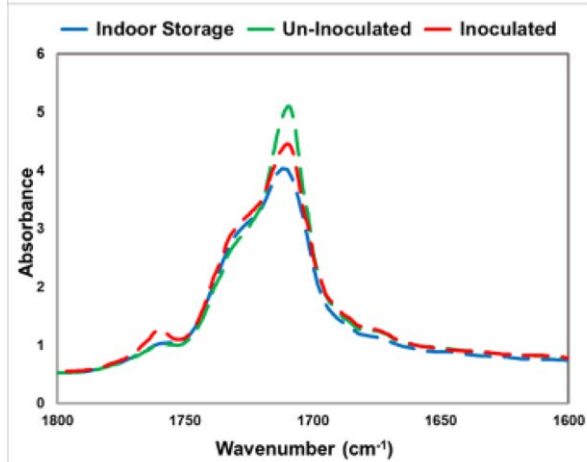

### D) PLA/PHA

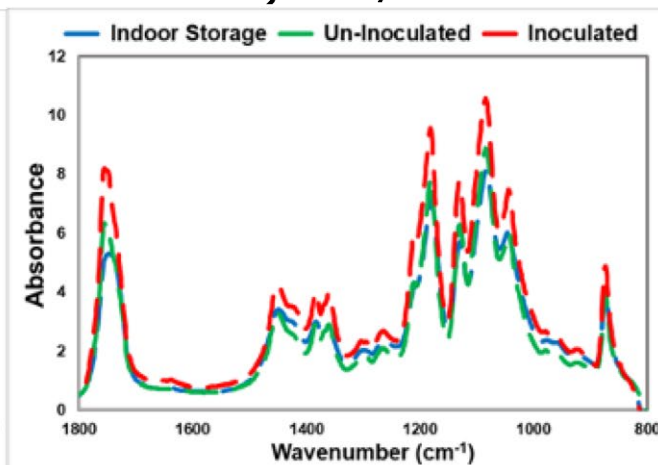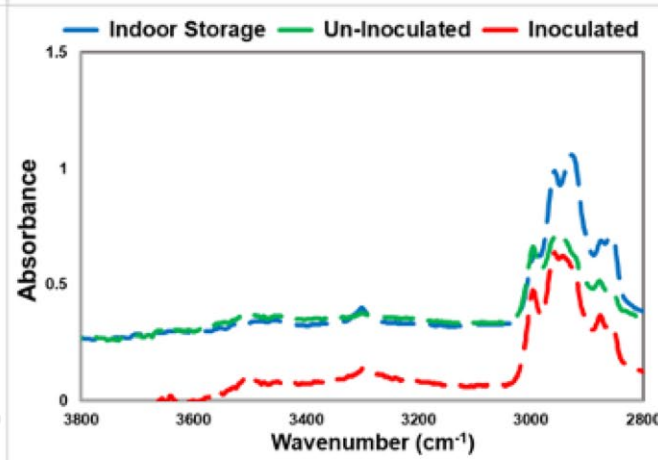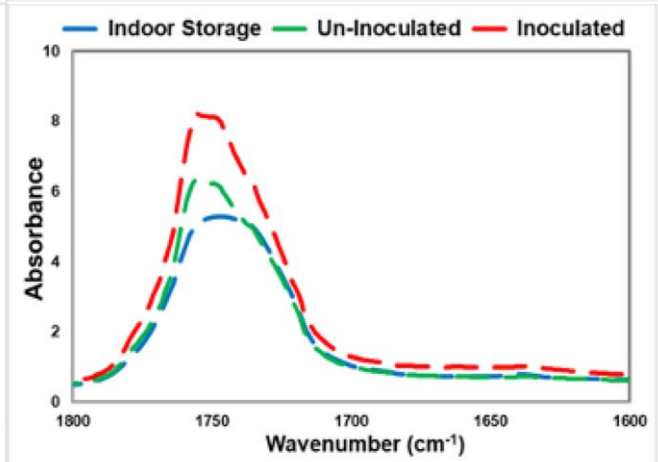

**Figure S2:** Fourier Transform Infra-red (FTIR) spectra of A) BioAgri, B) Naturecycle mulch, C) Organix, D) PLA/PHA films from lab incubation study at three conditions: indoor storage, un-inoculated and inoculated.



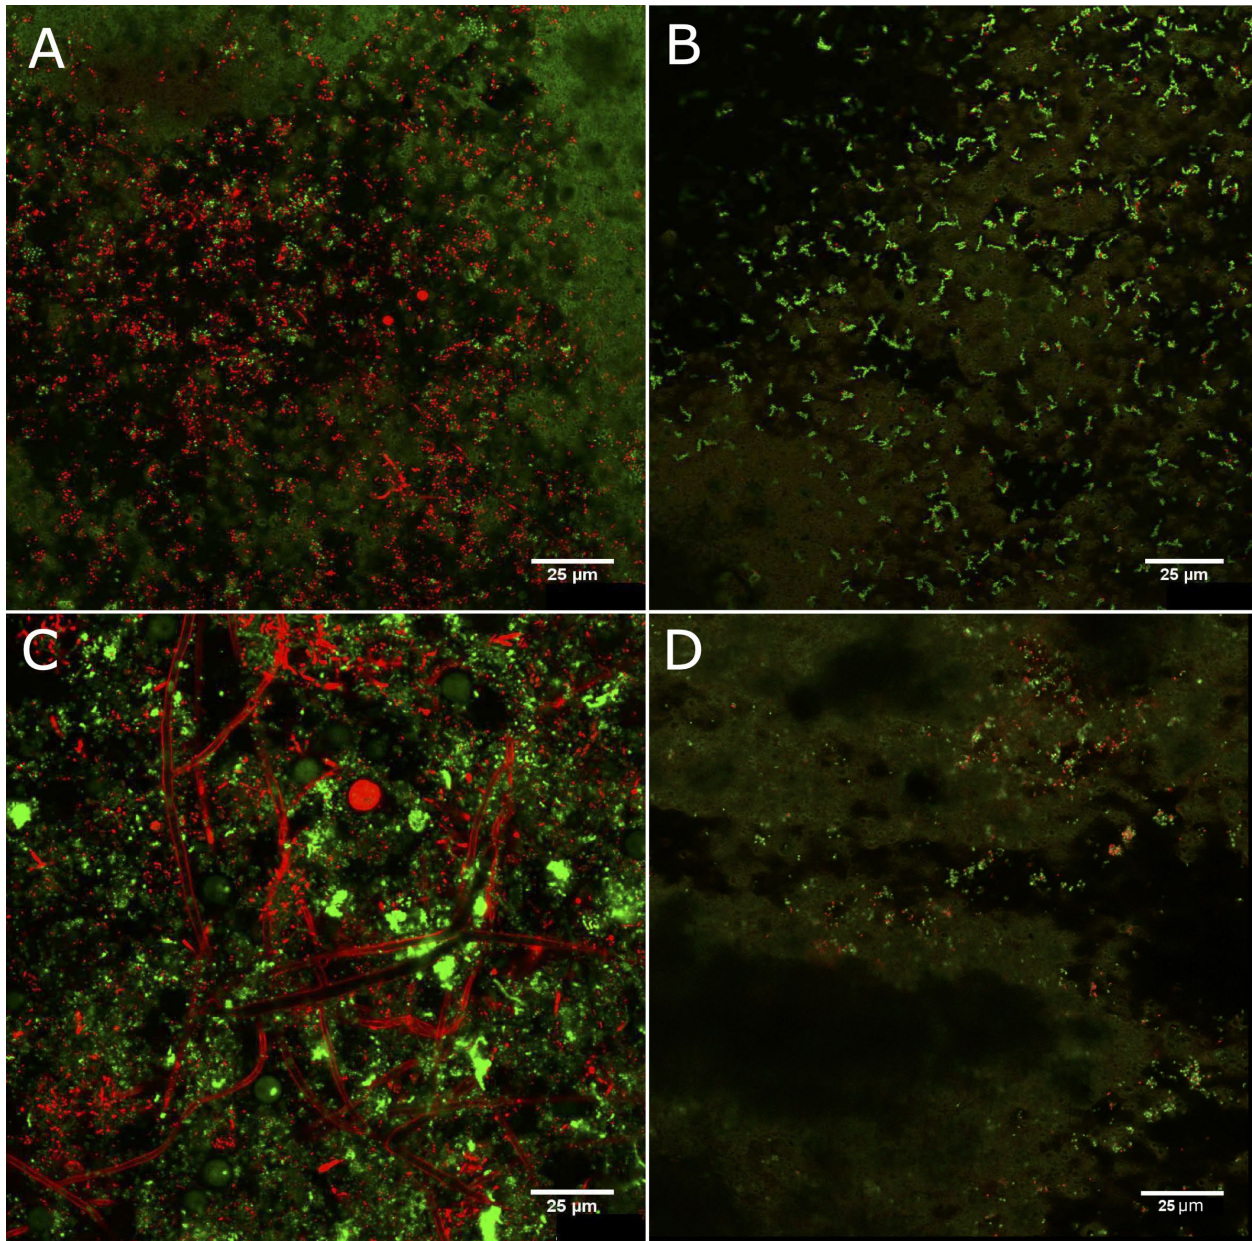

**Figure S3:** Confocal images of BDMs after enrichment using a Leica™ white light laser confocal system. a) BioAgri inoculated (3 weeks), b) BioAgri uninoculated (3 weeks), c) Naturecycle inoculated (3 weeks), d) Naturecycle uninoculated (6 weeks). Staining was done using a LIVE/DEAD® BacLight™ Bacterial Viability Kit. Green: live cells, Red: dead cells. Scale bars=25 µm.

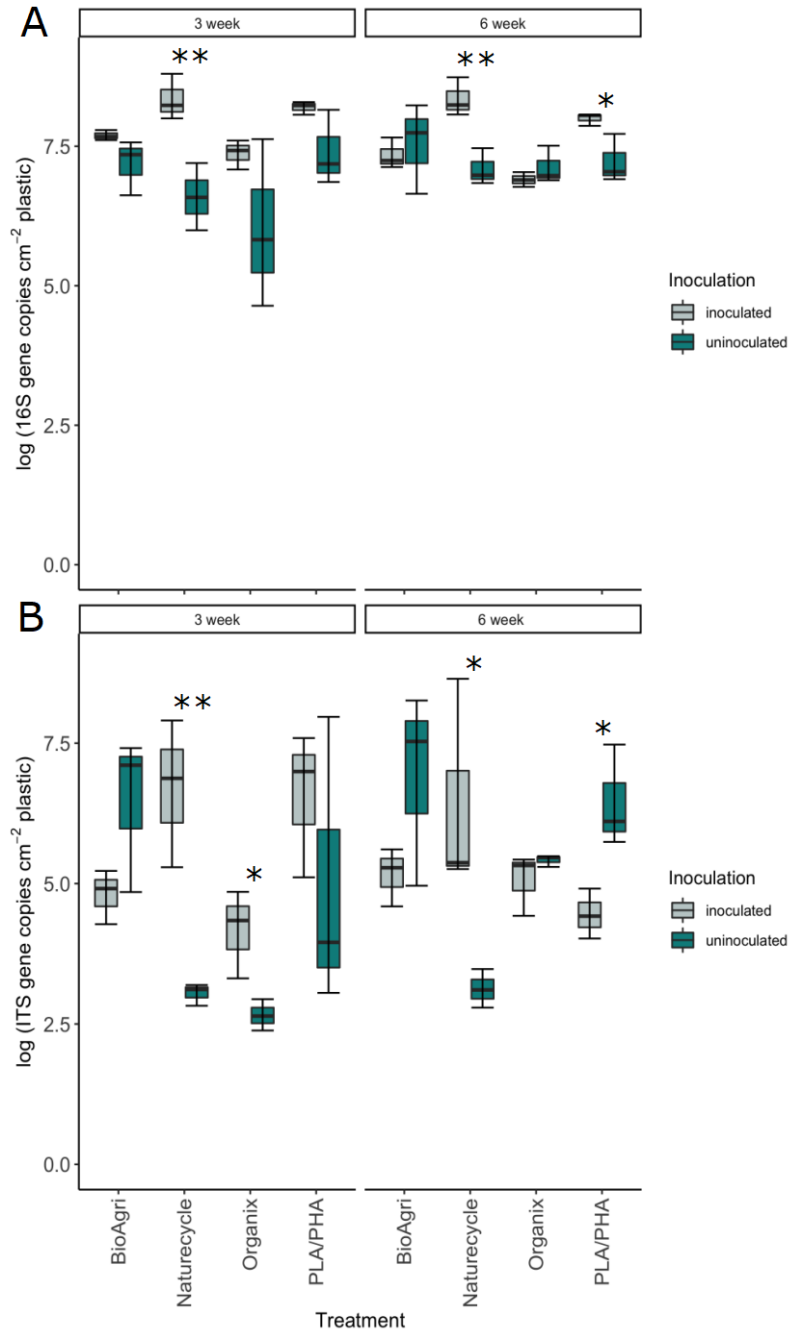

**Figure S4:** a) 16S rRNA (bacterial) and b) ITS (fungal) gene abundances for 3-week and 6-week incubations. Gene abundances are log transformed. The lower and upper hinges of the boxplots correspond to the 25th and 75th percentiles and the middle of the box denotes the median at 50th percentile. Whiskers show 1.5 times the inter-quartile range. Asterisks denote significant differences between uninoculated and inoculated enrichments from a one-way ANOVA; \* $p \leq 0.05$ , \*\* $p \leq 0.01$ , \*\*\* $p \leq 0.001$ .

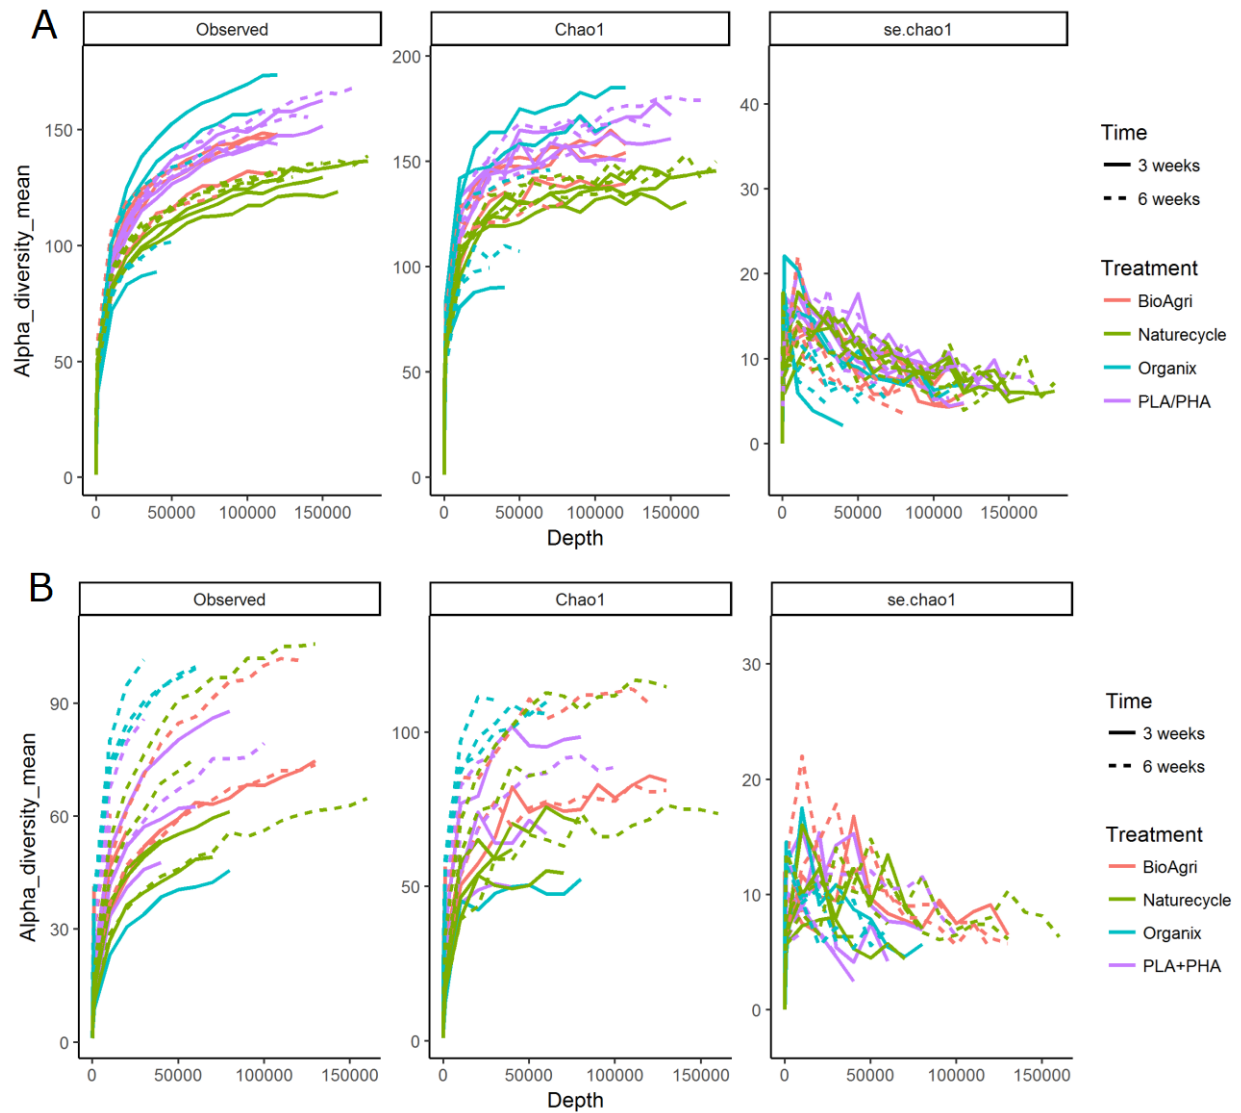

**Figure S5:** Alpha diversity measures calculated for lab enriched bacterial communities in a) Inoculated and b) Uninoculated samples. All reads were scaled to even depth. Observed: Observed number of OTUs. se: standard error.

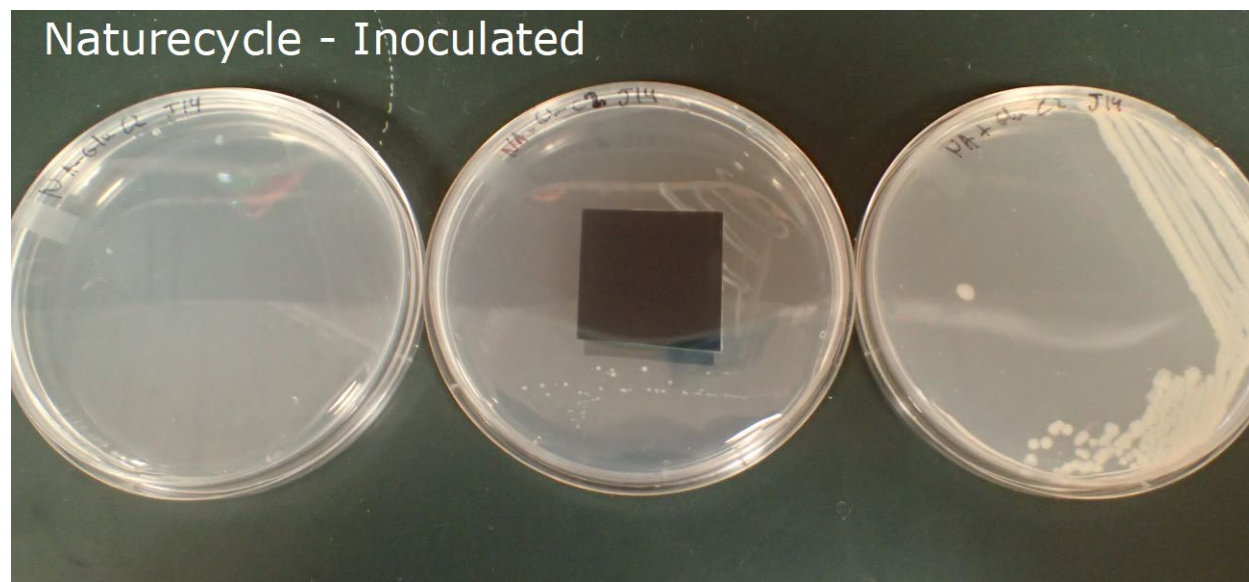

**Figure S6:** Images of example plates used for the isolation of BDM degrading microbes. Plate contained M9 minimal agar with plastic as sole carbon source. Streaking was completed using colonies from spread plates made with inoculum from culture bottles incubated for six weeks. Picture shows (left to right) negative control (no plastic, no glucose), treatment (media with plastic, no glucose), positive control (media with glucose).



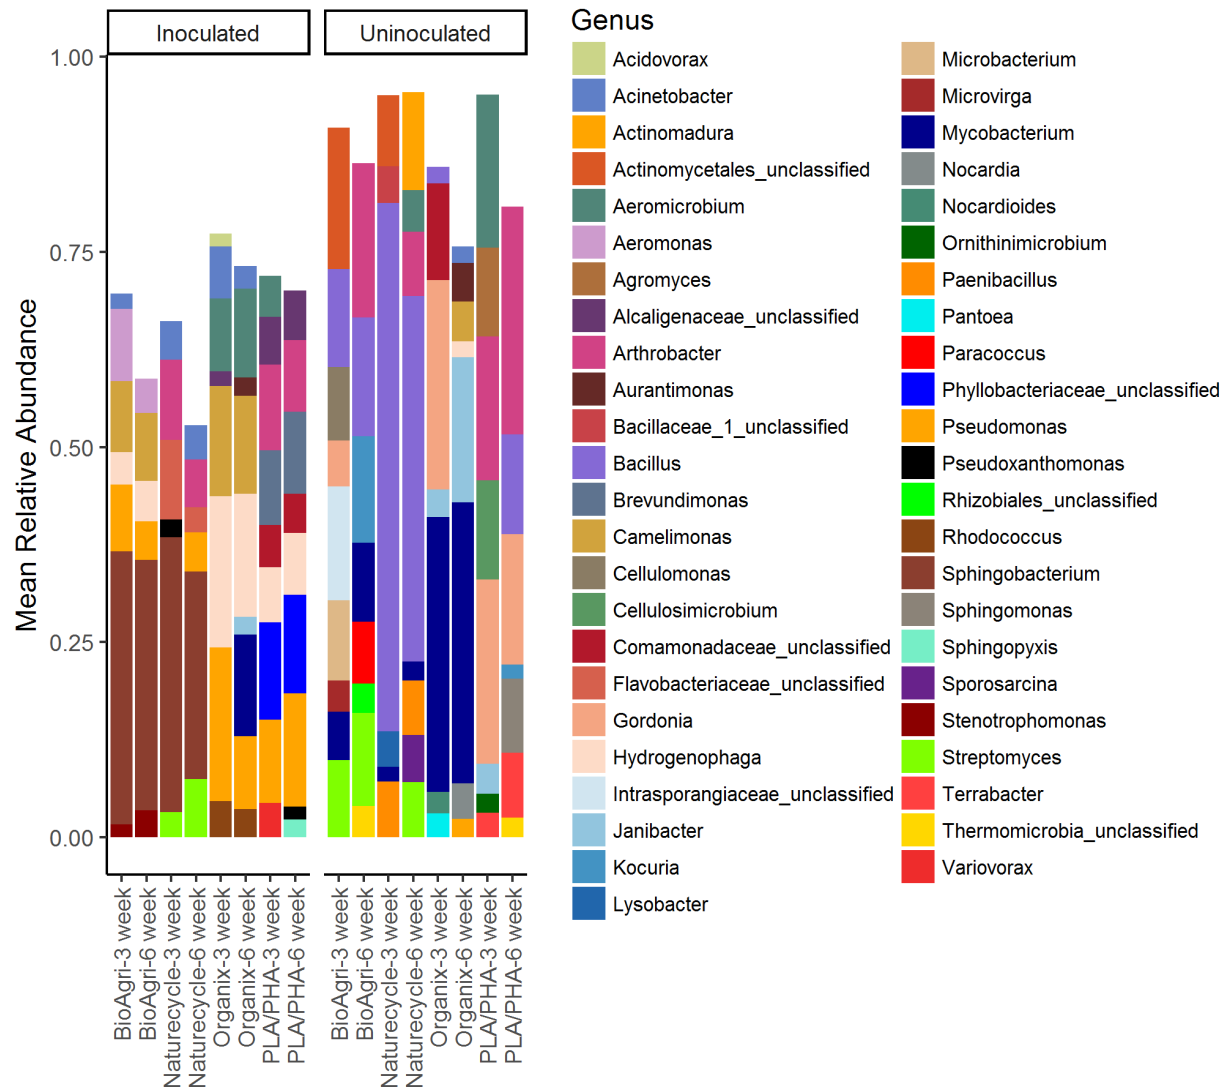

**Figure S7:** Bacterial taxa distribution (genus level) on mulch treatments for the enrichment cultures conducted for 3 weeks and 6 weeks. Mean relative abundances above a cut-off level of 5% are indicated. “unclassified” denote taxa with relative abundance above the cut-off level of 5%, but that could not be classified.



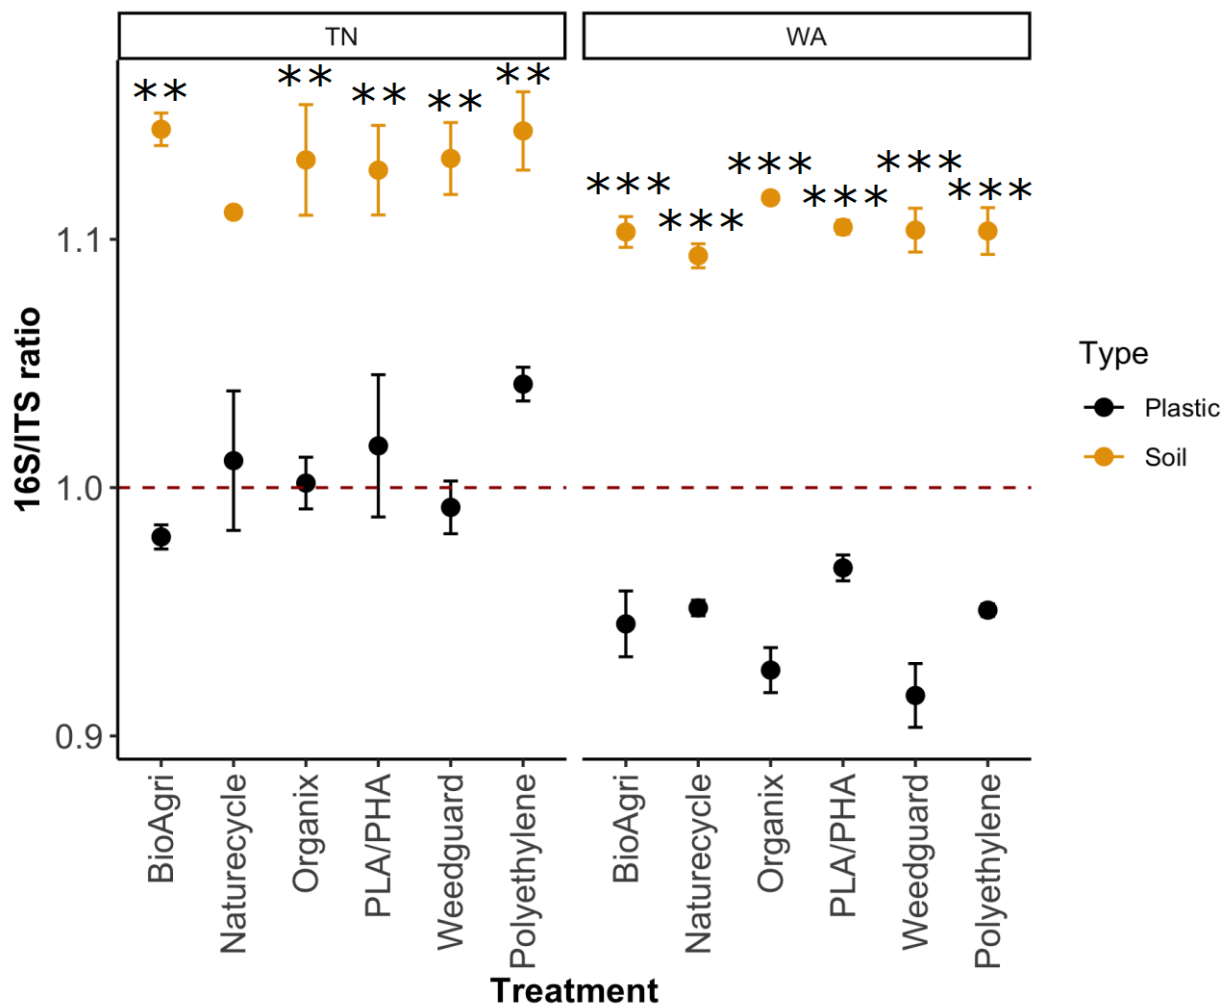

**Figure S8:** 16S/ITS gene abundance ratios for agriculturally-weathered plastics and bulk soil. Error bars indicate the standard error of the mean ( $n = 4$  for all treatments, except for Naturecycle soil and plastic treatments in TN and WA and BioAgri soil and plastic treatments in TN, where  $n = 3$ ). Red dashed line denotes a 1:1 threshold. Asterisks denote significant differences in 16S/ITS ratios between soil and plastic treatments from a t-test; \* $p \leq 0.05$ , \*\* $p \leq 0.01$ , \*\*\* $p \leq 0.001$ .

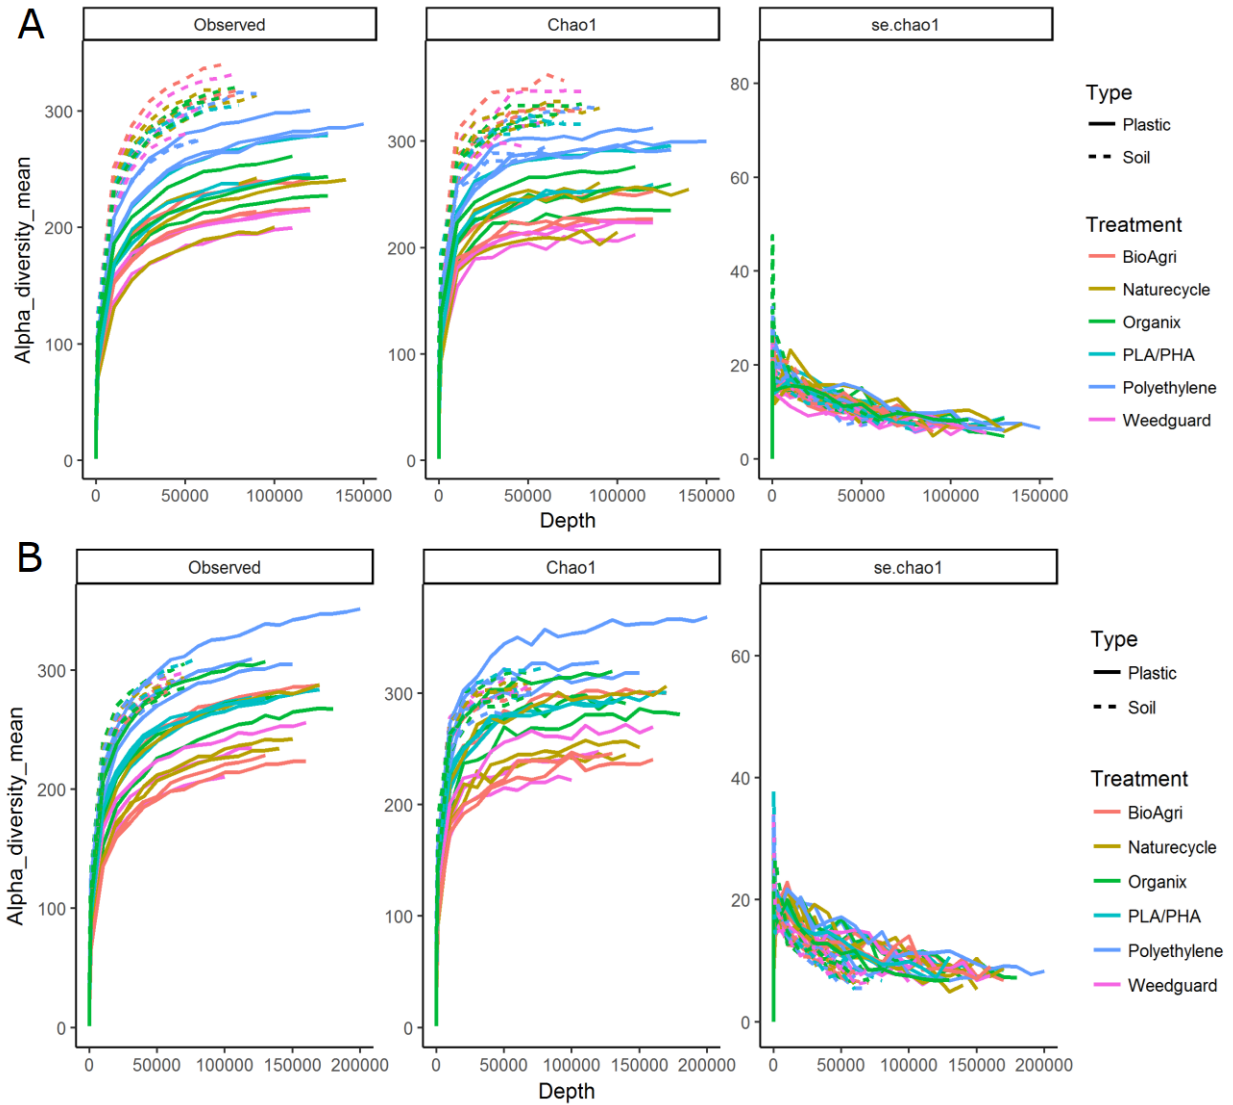

**Figure S9:** Richness measures as a function of sampling depth calculated for agriculturally-weathered plastic-associated bacterial communities and soil communities in a) TN and b) WA. All reads were scaled to even depth. Observed: Observed number of OTUs. se: standard error.

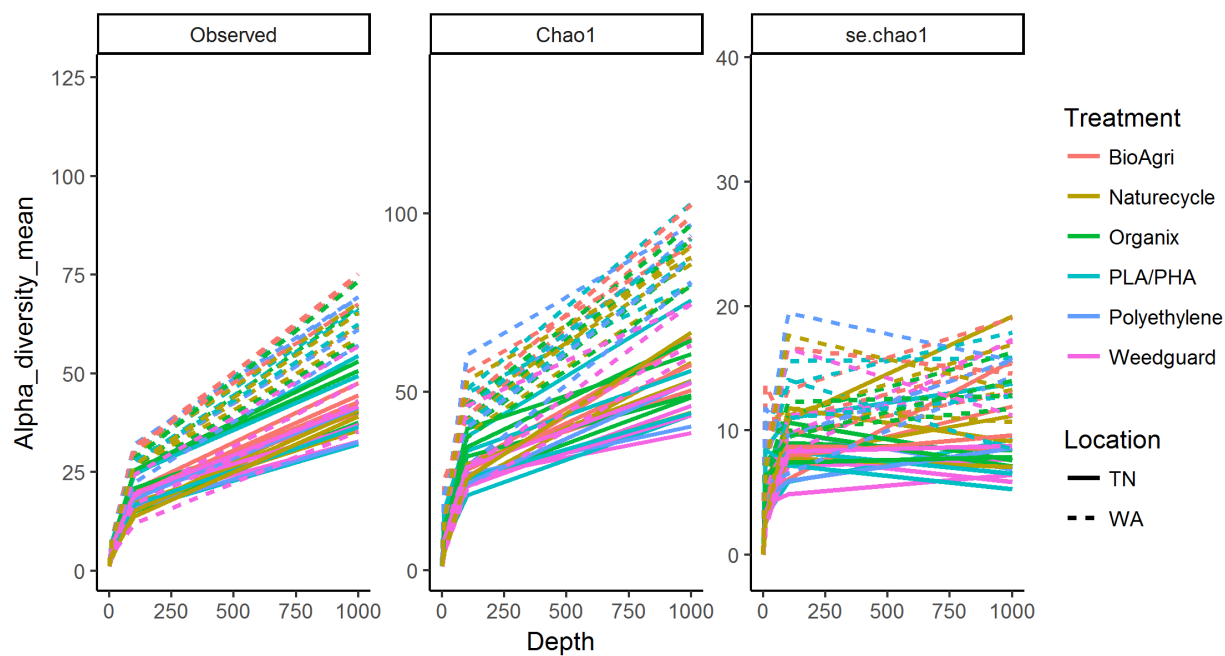

**Figure S10:** Richness measures as a function of sampling depth calculated for agriculturally-weathered plastic-associated eukaryotic communities in TN and WA. All reads were scaled to even depth. Observed: Observed number of OTUs. se: standard error.

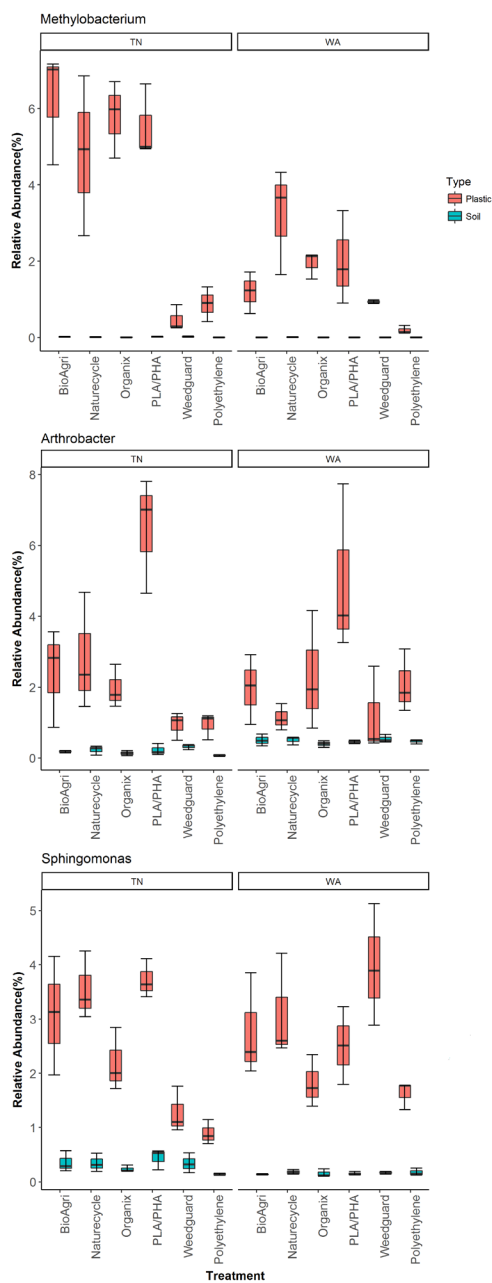

**Figure S11:** Percent relative abundance of taxa (Genus level) driving variance in microbial communities between soils and plastics in TN and WA as determined via SIMPER analysis. The lower and upper hinges of the boxplots correspond to the 25th and 75th percentiles and the middle of the box denotes the median at 50th percentile. Whiskers denote 1.5 times the interquartile range. Differences between plastic treatments were evaluated using Kruskal-Wallis non-parametric test. Significant differences were observed between plastic treatments in TN for *Methylobacterium* ( $p = 0.03$ ), *Arthrobacter* ( $p = 0.03$ ), and *Spingomonas* ( $p = 0.02$ ), and in WA significant differences were seen between plastic treatments for *Methylobacterium* ( $p = 0.03$ ) and *Spingomonas* ( $p = 0.03$ ). Significance was set at  $\alpha < 0.05$ .

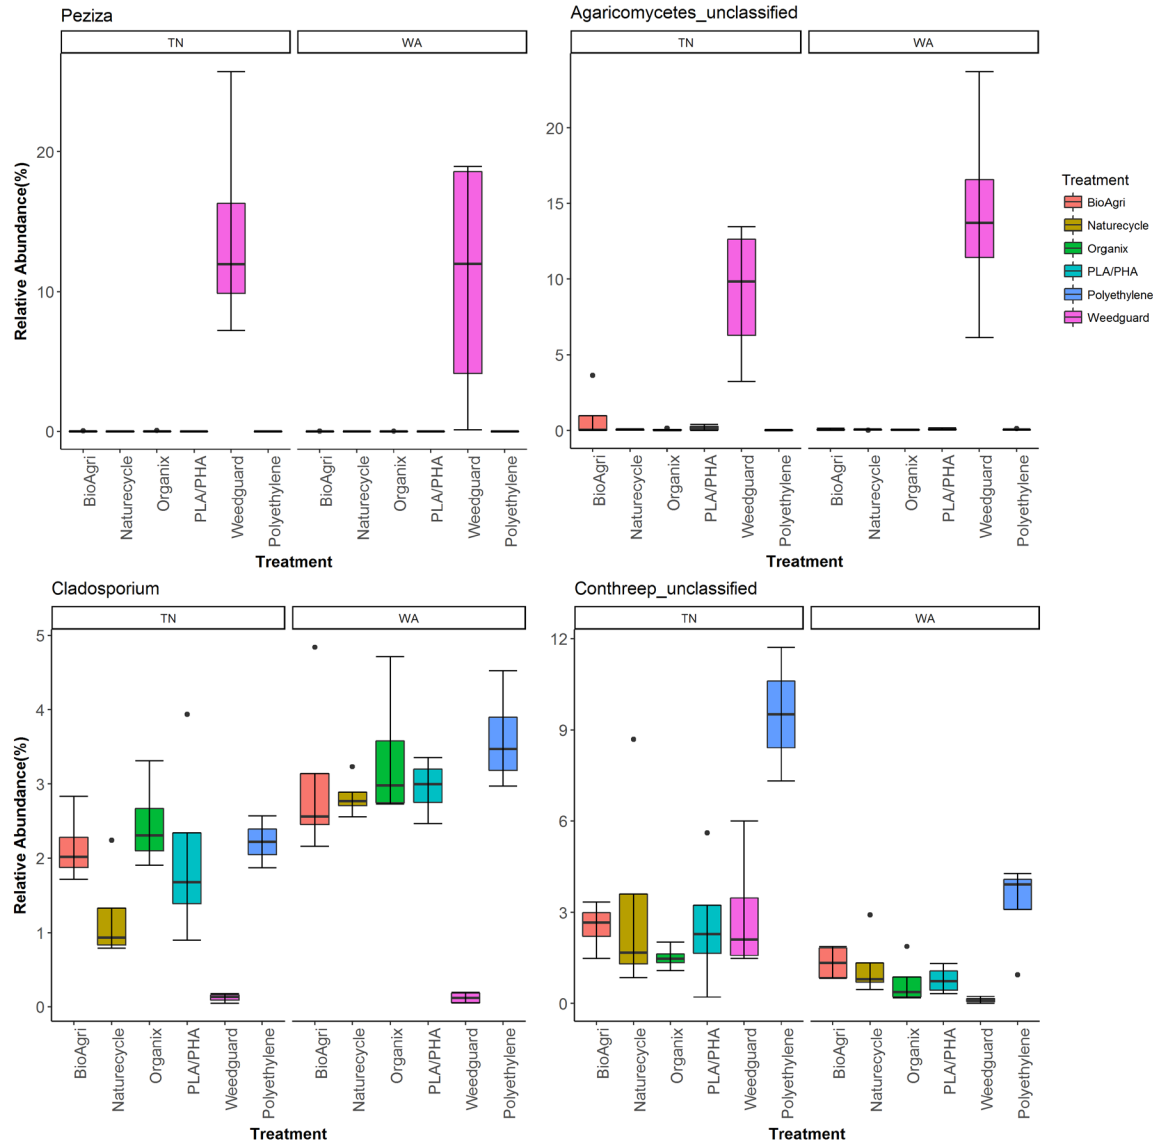

**Figure S12:** Percent relative abundance of taxa (genus level) driving overall differences in eukaryotic communities between agriculturally-weathered plastics in TN and WA as obtained via SIMPER analysis. The lower and upper hinges of the boxplots correspond to the 25th and 75th percentiles and the middle of the box denotes the median at 50th percentile. Lower whisker equals the smallest observation greater than or equal to lower hinge minus 1.5 times the inter-quartile range, i.e. the distance between the first and third quartiles. Upper whisker equals largest observation less than or equal to upper hinge plus 1.5 times the inter-quartile range, i.e. the distance between the first and third quartiles. “Taxa\_unclassified” denote taxa which could not be classified at the genus level. Differences between plastic treatments were evaluated using Kruskal-Wallis non-parametric test. Significant differences were observed between plastic treatments in TN for *Peziza* ( $p = 0.007$ ) and *Cladosporium* ( $p = 0.02$ ). In WA significant differences were seen between plastic treatments for *Peziza* ( $p = 0.01$ ), *Agaricomycetes\_unclassified* ( $p = 0.03$ ), *Cladosporium* ( $p = 0.03$ ) and *Conthreep\_unclassified* ( $p = 0.01$ ). Significance was set at  $\alpha < 0.05$ .



## Supplementary Tables

**Table S1:** Manufacturers, major constituents, and physicochemical properties of the mulches used in the study. Biobased content data was provided by the manufacturers. Data reported from Hayes et al. (2017).

| Mulches                 | Manufacturer                             | Major constituents                                                                                                                                                                                                            | Weight<br>(g m <sup>-2</sup> ) | Thickness<br>(µm) | Elongation<br>(%) | Contact<br>angle (°) | Total<br>carbon<br>(%) | Biobased<br>content<br>(%) |
|-------------------------|------------------------------------------|-------------------------------------------------------------------------------------------------------------------------------------------------------------------------------------------------------------------------------|--------------------------------|-------------------|-------------------|----------------------|------------------------|----------------------------|
| BioAgri®                | BioBag<br>Americas, Inc.,<br>Dunedin, FL | Mater-Bi® grade EF04P<br>(blend of starch and<br>PBAT)                                                                                                                                                                        | 18.0                           | 26                | 260               | 87.6                 | 57.6                   | 20-25                      |
| Naturecycle             | Custom<br>Bioplastics,<br>Burlington, WA | Blend of starch and<br>polyesters                                                                                                                                                                                             | 25.4                           | 48                | 213               | 69.2                 | 54.8                   | ~ 20                       |
| Organix A.G.<br>Film™   | Organix<br>Solutions, Maple<br>Grove, MN | BASF®ecovio® grade<br>M2351 (blend of PLA and<br>PBAT)                                                                                                                                                                        | 17.8                           | 20                | 273               | 86.2                 | 51.4                   | 10-20                      |
| Experimental<br>PLA/PHA | Metabolix Inc.,<br>Cambridge, MA         | 88.4% MD05-1501 (56%<br>Ingeo PLA, 24% Mirel™<br>amorphous PHA, 15%<br>CaCO <sub>3</sub> and 5%<br>plasticizer and processing<br>additives), 10.0%<br>Techmer PLA M91432<br>(20% carbon black in<br>PLA 3052) and 1.6%<br>PLA | 25.0                           | 33                | 247               | 67.8                 | 47.5                   | 86                         |

| <b>Mulches</b> | <b>Manufacturer</b>               | <b>Major constituents</b>          | <b>Weight<br/>(g m<sup>-2</sup>)</b> | <b>Thickness<br/>(μm)</b> | <b>Elongation<br/>(%)</b> | <b>Contact<br/>angle (°)</b> | <b>Total<br/>carbon<br/>(%)</b> | <b>Biobased<br/>content<br/>(%)</b> |
|----------------|-----------------------------------|------------------------------------|--------------------------------------|---------------------------|---------------------------|------------------------------|---------------------------------|-------------------------------------|
| WeedGuardPlus® | Sunshine Paper<br>Co., Aurora, CO | Cellulose                          | 240                                  | 479                       | 6.4                       | <10                          | 46.0                            | 100                                 |
| Polyethylene   | Filmtech,<br>Allentown, PA        | Linear low-density<br>polyethylene | 25.4                                 | 47                        | 578                       | 79.3                         | 82.9                            | < 1                                 |

PBAT: Polybutylene co-adipate co-terephthalate; PLA: Polylactic acid; PHA: Poly(hydroxyalkanoate)

**Table S2:** Environmental data collected in Fall 2016 when plastic mulches and soil were collected from the field site in TN and WA. Mean values are reported with standard errors. Full soil data is reported in Sintim et al. (2019).

| Location                | Bulk density (g cm <sup>-3</sup> ) | Soil texture | Soil type         | pH          | Mean annual soil temperature (°C) | Mean annual precipitation (mm) |
|-------------------------|------------------------------------|--------------|-------------------|-------------|-----------------------------------|--------------------------------|
| ETREC, Knoxville, TN    | 1.22 ± 0.01                        | Silt loam    | Typic hapludult   | 5.8 ± 0.08  | 16.8 ± 0.18                       | 46.77                          |
| NWREC, Mount Vernon, WA | 1.13 ± 0.01                        | Silt loam    | Typic fluvaquents | 5.54 ± 0.03 | 12.54 ± 0.12                      | 49.55                          |

**Table S3:** Weight-averaged molecular weight (Mw) and polydispersity index (PDI) of plastic mulches after 6-week incubation in enrichment cultures using gel permeation chromatography. Data represents one replicate measurement from BioAgri and PLA/PHA inoculated and uninoculated treatments.

|                      | Mw (kDa) | PDI  |
|----------------------|----------|------|
| BioAgri uninoculated | 369.76   | 2.90 |
| BioAgri inoculated   | 332.47   | 2.59 |
| PLA/PHA uninoculated | 333.21   | 1.88 |
| PLA/PHA inoculated   | 340.76   | 1.86 |

Mw: Weight-averaged Molecular weight (unit: kilodalton), PDI: polydispersity index

**Table S4:** Esterase enzyme activity in spent culture media after 3 weeks and 6 weeks of incubation. Activities are reported with standard errors of the mean. All technical replicates were assayed in triplicates. Bold numbers and asterisks denote significant difference in activities between 3 week and 6 week incubation for each treatment (\* $p \leq 0.05$ , \*\* $p \leq 0.01$ , \*\*\* $p \leq 0.001$ ).

| Treatment (time)      | Esterase enzyme activity in spent media of enrichment culture (activity expressed in $\mu\text{g } p\text{-nitrophenol released } \mu\text{l}^{-1} \text{ minute}^{-1}$ ) | T statistic   |
|-----------------------|---------------------------------------------------------------------------------------------------------------------------------------------------------------------------|---------------|
| BioAgri (3 weeks)     | 1.06 $\pm$ 0.23                                                                                                                                                           | <b>-4.26*</b> |
| BioAgri (6 weeks)     | 3.05 $\pm$ 0.31                                                                                                                                                           |               |
| PLA+PHA (3 weeks)     | 2.14 $\pm$ 0.06                                                                                                                                                           | <b>-4.50*</b> |
| PLA+PHA (6 weeks)     | 2.73 $\pm$ 0.13                                                                                                                                                           |               |
| Organix (3 weeks)     | 1.80 $\pm$ 0.46                                                                                                                                                           | 0.25          |
| Organix (6 weeks)     | 1.46 $\pm$ 0.87                                                                                                                                                           |               |
| Naturecycle (3 weeks) | 1.59 $\pm$ 0.35                                                                                                                                                           | -2.13         |
| Naturecycle (6 weeks) | 2.63 $\pm$ 0.21                                                                                                                                                           |               |

**Table S5:** F values of three-way ANOVAs for bacterial (16S rRNA) and fungal (ITS) gene copy abundances, and 16S/ITS ratios obtained from lab incubation study (type III tests reported). Bold numbers and asterisks denote significant difference between the factor levels and interaction effects (\* $p \leq 0.05$ , \*\* $p \leq 0.01$ , \*\*\* $p \leq 0.001$ ).

|                     |                                                    | 16S copies | ITS copies     | 16S/ITS ratios |
|---------------------|----------------------------------------------------|------------|----------------|----------------|
| Factor (levels)     | Time (3 weeks and 6 weeks)                         | 0.603      | 0.141          | 0.381          |
|                     | Inoculation (inoculated, uninoculated)             | 1.291      | 3.03           | 2.352          |
|                     | Treatment (BioAgri, Naturecycle, PLA/PHA, Organix) | 1.995      | <b>3.548*</b>  | 1.605          |
| Interaction effects | Time:Inoculation                                   | 1.241      | 0.006          | 0.125          |
|                     | Time:Treatment                                     | 0.204      | 1.902          | 1.92           |
|                     | Inoculation:Treatment                              | 1.507      | <b>5.305**</b> | <b>4.011*</b>  |
|                     | Time:Inoculation:Treatment                         | 1.010      | 1.421          | 1.805          |



**Table S6:** F values of one-way ANOVAs testing differences between 3 weeks and 6 weeks incubation times for 16S, ITS and 16S/ITS ratios for inoculated and uninoculated enrichments within individual treatments. Bold numbers and asterisks denote significant difference between 3-week and 6-week time points (\* $p \leq 0.05$ , \*\* $p \leq 0.01$ , \*\*\* $p \leq 0.001$ ).

| Factor (level)                                                 | Specific treatment | 16S copies    | ITS copies      | 16S/ITS ratio |
|----------------------------------------------------------------|--------------------|---------------|-----------------|---------------|
| <i>Time (3 weeks and 6 weeks) for inoculated enrichments</i>   | BioAgri            | 4.279         | 0.761           | 2.24          |
|                                                                | PLA/PHA            | 4.805         | 7.162           | <b>7.541*</b> |
|                                                                | Naturecycle        | 0             | 0.038           | 0.16          |
|                                                                | Organix            | <b>7.561*</b> | 2.585           | 2.847         |
| <i>Time (3 weeks and 6 weeks) for uninoculated enrichments</i> | BioAgri            | 0.431         | 0.129           | 0.027         |
|                                                                | PLA/PHA            | 0.141         | 0.82            | 2.171         |
|                                                                | Naturecycle        | 1.621         | 0.127           | 0.028         |
|                                                                | Organix            | 1.509         | <b>257.6***</b> | 4.565         |

**Table S7:** Mean richness (number of observed OTUs) and diversity (inverse Simpson Index) for plastic-associated bacterial communities in laboratory enrichments  $\pm$  standard deviations.

| Treatment                | Time    | Richness    | Diversity Index   |
|--------------------------|---------|-------------|-------------------|
| BioAgri-Inoculated       | 3 weeks | 58 $\pm$ 4  | 6.355 $\pm$ 0.523 |
| BioAgri-Inoculated       | 6 weeks | 66 $\pm$ 5  | 7.385 $\pm$ 2.22  |
| BioAgri-Uninoculated     | 3 weeks | 34 $\pm$ 19 | 3.336 $\pm$ 0.659 |
| BioAgri-Uninoculated     | 6 weeks | 28 $\pm$ 8  | 3.982 $\pm$ 0.782 |
| Naturecycle-Inoculated   | 3 weeks | 59 $\pm$ 2  | 6.553 $\pm$ 2.923 |
| Naturecycle-Inoculated   | 6 weeks | 64 $\pm$ 2  | 8.907 $\pm$ 2.246 |
| Naturecycle-Uninoculated | 3 weeks | 18 $\pm$ 4  | 2.137 $\pm$ 0.873 |
| Naturecycle-Uninoculated | 6 weeks | 21 $\pm$ 5  | 3.061 $\pm$ 1.083 |
| Organix-Inoculated       | 3 weeks | 56 $\pm$ 8  | 7.447 $\pm$ 1.221 |
| Organix-Inoculated       | 6 weeks | 58 $\pm$ 6  | 10.15 $\pm$ 1.318 |
| Organix-Uninoculated     | 3 weeks | 30 $\pm$ 16 | 2.563 $\pm$ 1.142 |
| Organix-Uninoculated     | 6 weeks | 49 $\pm$ 2  | 5.279 $\pm$ 1.221 |
| PLA+PHA-Inoculated       | 3 weeks | 60 $\pm$ 4  | 12.75 $\pm$ 1.131 |
| PLA+PHA-Inoculated       | 6 weeks | 59 $\pm$ 1  | 12.15 $\pm$ 2.19  |
| PLA+PHA-Uninoculated     | 3 weeks | 23 $\pm$ 5  | 3.025 $\pm$ 1.023 |
| PLA+PHA-Uninoculated     | 6 weeks | 36 $\pm$ 7  | 3.271 $\pm$ 0.649 |

**Table S8:** F values from three-way ANOVAs for richness (number of observed OTUs) and diversity (inverse Simpson Index) estimates obtained from lab incubation study (type III tests reported). Bold numbers and asterisks denote significant difference between the factor levels and interaction effects (\* $p \leq 0.05$ , \*\* $p \leq 0.01$ , \*\*\* $p \leq 0.001$ ).

|                     |                                                    | Richness F       | Diversity Index F |
|---------------------|----------------------------------------------------|------------------|-------------------|
|                     | Time (3 weeks and 6 weeks)                         | 1.574            | 0.721             |
|                     | Inoculation (inoculated, uninoculated)             | <b>14.021***</b> | <b>6.193*</b>     |
| Factor (levels)     | Treatment (BioAgri, Naturecycle, PLA/PHA, Organix) | 0.133            | <b>12.372***</b>  |
|                     | Time:Inoculation                                   | 2.615            | 0.05              |
|                     | Time:Treatment                                     | 0.365            | 1.528             |
| Interaction effects | Inoculation:Treatment                              | 1.589            | <b>5.778**</b>    |
|                     | Time:Inoculation:Treatment                         | 2.646            | 0.304             |

**Table S9:** F values from one-way ANOVAs testing differences in richness (number of observed OTUs) and diversity (inverse Simpson Index) in lab enrichments between mulch treatments, inoculated and uninoculated samples and time of incubation. Bold numbers and asterisks denote significant difference between the factor levels tested (\* $p \leq 0.05$ , \*\* $p \leq 0.01$ , \*\*\* $p \leq 0.001$ ).

| Factor      | Levels                                 | Within                 | Richness F      | Diversity Index F |
|-------------|----------------------------------------|------------------------|-----------------|-------------------|
| Treatment   | BioAgri, Naturecycle, Organix, PLA/PHA | 3 weeks (inoculated)   | 0.306           | <b>9.433**</b>    |
|             |                                        | 6 weeks (inoculated)   | 2.551           | 2.946             |
|             |                                        | 3 weeks (uninoculated) | 0.908           | 0.934             |
|             |                                        | 6 weeks (uninoculated) | <b>11.78**</b>  | 3.257             |
| Inoculation | Inoculated, uninoculated               | 3 weeks                | <b>77.34***</b> | <b>12.94*</b>     |
|             |                                        | 6 weeks                | <b>20.21**</b>  | <b>26.14**</b>    |
| Time        | 3 weeks, 6 weeks                       | Inoculated             | 2.807           | 0.572             |
|             |                                        | Uninoculated           | 0.977           | 4.017             |

**Table S10:** PERMANOVA statistics (F values) to test for significant differences in microbial community composition. PERMANOVAs were computed with Adonis function in R vegan package. Bold numbers and asterisks indicate significant differences between the levels tested; \*\*\* $p \leq 0.001$ , \*\*  $p \leq 0.01$ , \* $p \leq 0.05$ .

|                                                        | Factor       | Levels                                 | Within                   | PERMANOVA F      |
|--------------------------------------------------------|--------------|----------------------------------------|--------------------------|------------------|
| Lab enrichment cultures                                | Time         | 3 weeks, 6 weeks                       | PLA/PHA (inoculated)     | 0.557            |
|                                                        |              |                                        | Organix (inoculated)     | 2.203            |
|                                                        |              |                                        | Naturecycle (inoculated) | 0.816            |
|                                                        |              |                                        | BioAgri (inoculated)     | 0.911            |
|                                                        | Treatment    | BioAgri, Naturecycle, Organix, PLA/PHA | 3 weeks (inoculated)     | <b>12.454***</b> |
|                                                        |              |                                        | 6 week (inoculated)      | <b>10.283***</b> |
|                                                        | Innoculation | Innoculated, uninoculated              | 3 weeks                  | <b>7.636***</b>  |
|                                                        |              |                                        | 6 weeks                  | <b>7.252***</b>  |
| Agriculturally-weathered films: Bacterial communities  | Location     | TN, WA                                 | Soil                     | <b>45.458***</b> |
|                                                        |              |                                        | Plastic                  | <b>9.856***</b>  |
|                                                        | Type         | Soil, plastic                          | TN                       | <b>59.551***</b> |
|                                                        |              |                                        | WA                       | <b>107.77***</b> |
|                                                        | Treatment    | BioAgri, Naturecycle, Organix, PLA/PHA | TN Soil                  | 1.035            |
|                                                        |              |                                        | WA Soil                  | 1.133            |
|                                                        |              |                                        | TN Plastic               | <b>5.172***</b>  |
|                                                        |              |                                        | WA Plastic               | <b>2.833***</b>  |
| Agriculturally-weathered films: Eukaryotic communities | Location     | TN, WA                                 |                          | <b>16.666***</b> |
|                                                        | Treatment    | BioAgri, Naturecycle, Organix, PLA/PHA | Location (TN)            | <b>6.782***</b>  |
|                                                        |              |                                        | Location (WA)            | <b>10.419***</b> |



**Table S11:** Summary statistics (F values) for one-way ANOVAs testing differences between inoculated and uninoculated enrichments for 16S, ITS and 16S/ITS ratios at 3-week and 6-week time points. Bold numbers and asterisks indicate significant differences between the levels tested; \*\*\* $p \leq 0.001$ , \*\*  $p \leq 0.01$ , \* $p \leq 0.05$ .

| Factor (level)                                                  | Treatment   | 16S copies     | ITS copies     | 16S/ITS ratio  |
|-----------------------------------------------------------------|-------------|----------------|----------------|----------------|
| <i>Inoculation (3-week inoculated and uninoculated samples)</i> | BioAgri     | 3.096          | 3.731          | 4.721          |
|                                                                 | PLA/PHA     | 4.078          | 0.871          | 0.996          |
|                                                                 | Naturecycle | <b>17.32**</b> | <b>22.53**</b> | <b>12.7*</b>   |
|                                                                 | Organix     | 2.305          | <b>9.901*</b>  | 0.994          |
| <i>Inoculation (6-week inoculated and uninoculated samples)</i> | BioAgri     | 0.16           | 2.831          | 6.024          |
|                                                                 | PLA/PHA     | <b>8.781*</b>  | <b>11.52*</b>  | <b>39.39**</b> |
|                                                                 | Naturecycle | <b>20.69**</b> | <b>8.559*</b>  | <b>11.6*</b>   |
|                                                                 | Organix     | 1.139          | 1.218          | 0.398          |

**Table S12:** Identity of isolated strains from enrichment cultures. Identity determined by BLAST alignment of 16S rRNA genes amplified with 8F and 1492R primers to NCBI Genbank database.

| BDM used in enrichment | Top BLAST hit             | Sequence identity with NCBI Genbank |
|------------------------|---------------------------|-------------------------------------|
| Naturecycle            | <i>Streptomyces</i> sp. 1 | 97%                                 |
|                        | <i>Streptomyces</i> sp. 2 | 98%                                 |
|                        | <i>Arthrobacter</i> sp.   | 95%                                 |
|                        | <i>Streptomyces</i> sp. 3 | 99%                                 |
|                        | <i>Microbacterium</i> sp. | 98%                                 |
|                        | <i>Streptomyces</i> sp. 4 | 97%                                 |
| BioAgri                | <i>Variovorax</i> sp.     | 99%                                 |
|                        | <i>Arthrobacter</i> sp.   | 97%                                 |
|                        | <i>Pseudomonas</i> sp.    | 96%                                 |
| Organix                | <i>Streptomyces</i> sp.   | 98%                                 |
|                        | <i>Devosia</i> sp.        | 93%                                 |

**Table S13:** F values of one-way ANOVAs testing differences between treatments for 16S, ITS and 16S/ITS ratios for 3-week and 6-week incubations (inoculated and uninoculated). Bold numbers and asterisks indicate significant differences between treatments; \*\*\* $p \leq 0.001$ , \*\*  $p \leq 0.01$ , \* $p \leq 0.05$ .

| Factor (level)                                                                  | Time    | 16S copies      | ITS copies     | 16S/ITS ratio   |
|---------------------------------------------------------------------------------|---------|-----------------|----------------|-----------------|
| Treatment (BioAgri, Naturecycle, Organix, PLA/PHA) for inoculated enrichments   | 3 weeks | <b>9.35**</b>   | <b>4.504*</b>  | 2.47            |
|                                                                                 | 6 weeks | <b>22.19***</b> | 1.846          | 3.475           |
| Treatment (BioAgri, Naturecycle, Organix, PLA/PHA) for uninoculated enrichments | 3 weeks | 1.368           | <b>4.218*</b>  | 2.55            |
|                                                                                 | 6 weeks | 0.466           | <b>8.619**</b> | <b>20.82***</b> |

**Table S14:** Tukey post hoc tests for 3-week and 6-week incubations showing pairwise comparison of 16S and ITS copy numbers between inoculated mulch treatments. Data shown for only those time points which showed significant differences by one-way ANOVA. Bold numbers and asterisks indicate significant differences between treatments; \*\*\* $p \leq 0.001$ , \*\*  $p \leq 0.01$ , \* $p \leq 0.05$ .

| 16S or ITS abundance                               | Pairwise comparison<br>(Tukey post hoc) | P value          |
|----------------------------------------------------|-----------------------------------------|------------------|
| 16S copies after 3-week incubation<br>(inoculated) | Naturecycle - BioAgri                   | 0.056            |
|                                                    | Organix - BioAgri                       | 0.45             |
|                                                    | PLA+PHA - BioAgri                       | 0.15             |
|                                                    | Organix - Naturecycle                   | <b>0.007**</b>   |
|                                                    | PLA+PHA - Naturecycle                   | 0.89             |
|                                                    | PLA+PHA - Organix                       | <b>0.02*</b>     |
| 16S copies after 6-week incubation<br>(inoculated) | Naturecycle - BioAgri                   | <b>0.004**</b>   |
|                                                    | Organix - BioAgri                       | 0.19             |
|                                                    | PLA+PHA - BioAgri                       | <b>0.04*</b>     |
|                                                    | Organix - Naturecycle                   | <b>0.0003***</b> |
|                                                    | PLA+PHA - Naturecycle                   | 0.33             |
|                                                    | PLA+PHA - Organix                       | <b>0.002**</b>   |
| ITS copies after 3-week incubation<br>(inoculated) | Naturecycle - BioAgri                   | 0.19             |
|                                                    | Organix - BioAgri                       | 0.87             |
|                                                    | PLA+PHA - BioAgri                       | 0.23             |
|                                                    | Organix - Naturecycle                   | 0.07             |
|                                                    | PLA+PHA - Naturecycle                   | 0.999            |
|                                                    | PLA+PHA -Organix                        | 0.08             |

**Table S15:** F values from a mixed model ANOVA for 16S/ITS ratios, richness (number of observed OTUs) and diversity (inverse Simpson Index) estimates obtained from field study (type III tests reported). Bold numbers and asterisks indicate significant differences between factor levels and interaction effects; \*\*\* $p \leq 0.001$ , \*\*  $p \leq 0.01$ , \* $p \leq 0.05$ .

|                                                                             |                         | 16S/ITS ratios    | Richness F       | Diversity Index F |
|-----------------------------------------------------------------------------|-------------------------|-------------------|------------------|-------------------|
| Treatment (BioAgri, Naturecycle, PLA/PHA, Organix, Weedguard, Polyethylene) |                         | 1.59              | <b>7.31***</b>   | 0.999             |
| Factor (levels)                                                             | Type (Soil and Plastic) | <b>2704.66***</b> | <b>355.95***</b> | <b>33.019***</b>  |
|                                                                             | Location (TN and WA)    | <b>57.84***</b>   | 0.03             | <b>21.970**</b>   |
| Interaction effects                                                         | Treatment:Type          | <b>9.26***</b>    | <b>14.63***</b>  | 1.673             |
|                                                                             | Treatment:Location      | 0.72              | 0.96             | 1.908             |
|                                                                             | Type:Location           | <b>44.98***</b>   | <b>21.13***</b>  | <b>24.316***</b>  |
|                                                                             | Treatment:Type:Location | <b>2.75*</b>      | 0.35             | 1.062             |

**Table S16:** F values of one-way ANOVAs testing differences in 16S/ITS ratios on agriculturally-weathered plastics between locations and treatments, and between bulk soil and agriculturally-weathered plastic. Bold numbers and asterisks indicate significant differences between factor levels tested; \*\*\* $p \leq 0.001$ , \*\*  $p \leq 0.01$ , \* $p \leq 0.05$ .

| Factor     | Levels                                                               | Within | F value         |
|------------|----------------------------------------------------------------------|--------|-----------------|
| Location   | TN, WA                                                               |        | <b>57.46***</b> |
| Treatments | BioAgri, Naturecycle,<br>PLA/PHA Organix,<br>Polyethylene, Weedguard | TN     | 1.402           |
|            |                                                                      | WA     | <b>4.564**</b>  |
| Type       | Soil, plastic                                                        | TN     | <b>174.2***</b> |
|            |                                                                      | WA     | <b>377.9***</b> |

**Table S17:** F values from one-way ANOVAs testing differences in richness (number of observed OTUs) and diversity (inverse Simpson Index) metrics for field enrichment study by mulch treatments, location and soil and plastic communities. Bold numbers and asterisks indicate significant differences between factor levels tested; \*\*\* $p \leq 0.001$ , \*\*  $p \leq 0.01$ , \* $p \leq 0.05$ .

| Factor    | Levels        | Within    | Richness F       | Diversity Index F |
|-----------|---------------|-----------|------------------|-------------------|
| Treatment | BioAgri,      | Plastic   | <b>7.374**</b>   | 0.239             |
|           | Naturecycle,  | (TN)      |                  |                   |
|           | Organix,      | Soil (TN) | 2.204            | 1.755             |
|           | PLA/PHA       | Plastic   | <b>5.567**</b>   | 2.538             |
|           |               | (WA)      |                  |                   |
|           |               | Soil (WA) | 0.226            | 1.133             |
| Location  | TN, WA        | Plastic   | 1.105            | <b>17.41**</b>    |
|           |               | Soil      | <b>10.84**</b>   | 0.017             |
| Type      | Soil, plastic | TN        | <b>50.36 ***</b> | 0.976             |
|           |               | WA        | <b>16.52**</b>   | <b>21.2***</b>    |

**Table S18:** Mean richness (number of observed OTUs) and diversity (inverse Simpson Index) for plastic-associated and bulk soil bacterial communities in TN and WA,  $\pm$  standard deviation.

| Location | Treatment    | Sample Type | Richness     | Diversity Index    |
|----------|--------------|-------------|--------------|--------------------|
| TN       | BioAgri      | Plastic     | 209 $\pm$ 14 | 10.028 $\pm$ 3.322 |
| WA       | BioAgri      | Plastic     | 215 $\pm$ 32 | 13.443 $\pm$ 4.481 |
| TN       | Naturecycle  | Plastic     | 210 $\pm$ 22 | 12.397 $\pm$ 3.833 |
| WA       | Naturecycle  | Plastic     | 222 $\pm$ 20 | 14.055 $\pm$ 2.117 |
| TN       | Organix      | Plastic     | 223 $\pm$ 17 | 11.555 $\pm$ 2.441 |
| WA       | Organix      | Plastic     | 251 $\pm$ 28 | 21.138 $\pm$ 3.904 |
| TN       | PLA/PHA      | Plastic     | 235 $\pm$ 17 | 9.641 $\pm$ 1.499  |
| WA       | PLA/PHA      | Plastic     | 249 $\pm$ 6  | 14.625 $\pm$ 4.889 |
| TN       | Polyethylene | Plastic     | 265 $\pm$ 13 | 9.48 $\pm$ 5.066   |
| WA       | Polyethylene | Plastic     | 286 $\pm$ 14 | 22.348 $\pm$ 5.921 |
| TN       | Weedguard    | Plastic     | 194 $\pm$ 8  | 10.041 $\pm$ 6.677 |
| WA       | Weedguard    | Plastic     | 211 $\pm$ 15 | 19.354 $\pm$ 3.185 |
| TN       | BioAgri      | Soil        | 314 $\pm$ 15 | 10.046 $\pm$ 0.849 |
| WA       | BioAgri      | Soil        | 283 $\pm$ 4  | 10.01 $\pm$ 0.679  |
| TN       | Naturecycle  | Soil        | 305 $\pm$ 9  | 10.466 $\pm$ 0.681 |
| WA       | Naturecycle  | Soil        | 289 $\pm$ 5  | 9.246 $\pm$ 1.002  |
| TN       | Organix      | Soil        | 303 $\pm$ 7  | 9.167 $\pm$ 0.477  |
| WA       | Organix      | Soil        | 285 $\pm$ 11 | 9.293 $\pm$ 1.389  |
| TN       | PLA/PHA      | Soil        | 298 $\pm$ 3  | 10.206 $\pm$ 1.287 |
| WA       | PLA/PHA      | Soil        | 289 $\pm$ 8  | 10.001 $\pm$ 1.229 |
| TN       | Polyethylene | Soil        | 282 $\pm$ 15 | 8.875 $\pm$ 0.804  |
| WA       | Polyethylene | Soil        | 285 $\pm$ 11 | 10.348 $\pm$ 1.104 |
| TN       | Weedguard    | Soil        | 302 $\pm$ 19 | 10.955 $\pm$ 1.639 |
| WA       | Weedguard    | Soil        | 287 $\pm$ 5  | 11.154 $\pm$ 1.374 |

**Table S19:** Mean richness (number of observed OTUs) and diversity (inverse Simpson Index) for agriculturally-weathered plastic associated eukaryotic communities in TN and WA  $\pm$  standard deviation.

| Location | Treatment    | Richness    | Diversity Index   |
|----------|--------------|-------------|-------------------|
| TN       | BioAgri      | 55 $\pm$ 4  | 5.413 $\pm$ 1.596 |
| WA       | BioAgri      | 87 $\pm$ 6  | 12.97 $\pm$ 3.891 |
| TN       | Naturecycle  | 49 $\pm$ 3  | 2.951 $\pm$ 0.962 |
| WA       | Naturecycle  | 81 $\pm$ 5  | 12.29 $\pm$ 1.036 |
| TN       | Organix      | 55 $\pm$ 7  | 6.058 $\pm$ 1.401 |
| WA       | Organix      | 84 $\pm$ 10 | 9.886 $\pm$ 1.657 |
| TN       | PLA/PHA      | 52 $\pm$ 14 | 6.158 $\pm$ 3.467 |
| WA       | PLA/PHA      | 85 $\pm$ 6  | 12.9 $\pm$ 1.219  |
| TN       | Polyethylene | 45 $\pm$ 8  | 8.173 $\pm$ 1.303 |
| WA       | Polyethylene | 81 $\pm$ 8  | 11.19 $\pm$ 2.349 |
| TN       | Weedguard    | 44 $\pm$ 5  | 6.533 $\pm$ 1.562 |
| WA       | Weedguard    | 60 $\pm$ 10 | 5.516 $\pm$ 2.158 |

**Table S20:** F values from one-way ANOVAs testing differences in richness (number of observed OTUs) and diversity (inverse Simpson Index) between field mulch treatments and location for plastic-associated eukaryotic communities. Bold numbers and asterisks indicate significant differences between factor levels tested; \*\*\* $p \leq 0.001$ , \*\*  $p \leq 0.01$ , \* $p \leq 0.05$ .

| Factor    | Levels                                 | Within  | Richness F      | Diversity Index F |
|-----------|----------------------------------------|---------|-----------------|-------------------|
| Treatment | BioAgri, Naturecycle, Organix, PLA/PHA | TN      | 0.755           | 1.236             |
|           |                                        | WA      | <b>6.132**</b>  | <b>6.31**</b>     |
| Location  | TN, WA                                 | Plastic | <b>45.16***</b> | <b>13.2**</b>     |



**Table S21:** Percent contribution of individual taxa identified using SIMPER contributing up to 40% variation in microbial community composition between soil and agriculturally-weathered mulch associated bacterial communities in TN and WA.

| Location | OTU number | Genus                              | % contribution |
|----------|------------|------------------------------------|----------------|
| TN       | 28         | <i>Methylobacterium</i>            | 14             |
|          | 1          | Bacteria_unclassified              | 11             |
|          | 93         | <i>Bacillus</i>                    | 5              |
|          | 20         | <i>Sphingomonas</i>                | 6              |
|          | 71         | <i>Arthrobacter</i>                | 4              |
|          | 38         | <i>Deinococcus</i>                 | 3              |
| WA       | 38         | <i>Deinococcus</i>                 | 8              |
|          | 1          | Bacteria_unclassified              | 8              |
|          | 29         | <i>Hymenobacter</i>                | 7              |
|          | 20         | <i>Sphingomonas</i>                | 7              |
|          | 28         | <i>Methylobacterium</i>            | 5              |
|          | 71         | <i>Arthrobacter</i>                | 4              |
|          | 35         | <i>Comamonadaceae_unclassified</i> | 4              |

## References

- Hayes, D.G., Wadsworth, L.C., Sintim, H.Y., Flury, M., English, M., Schaeffer, S., et al. (2017). Effect of diverse weathering conditions on the physicochemical properties of biodegradable plastic mulches. *Polymer Testing* 62, 454-467. doi: 10.1016/j.polymertesting.2017.07.027.
- Sintim, H.Y., Bandopadhyay, S., English, M.E., Bary, A.I., DeBruyn, J.M., Schaeffer, S.M., et al. (2019). Impacts of biodegradable plastic mulches on soil health. *Agriculture, Ecosystems & Environment* 273, 36-49. doi: 10.1016/j.agee.2018.12.002.
